## 1 **Cortical Connectivity In A Macaque Model Of Congenital Blindness**

2  
3 Loïc Magrou<sup>1</sup>, Pascal Barone<sup>2,3</sup>, Nikola T. Markov<sup>4</sup>, Herbert Killackey<sup>5</sup>, Pascale Giroud<sup>1</sup>,  
4 Michel Berland<sup>1</sup>, Kenneth Knoblauch<sup>1</sup>, Colette Dehay<sup>1</sup>, Henry Kennedy<sup>1</sup>

- 5  
6 1. Univ Lyon, Université Claude Bernard Lyon 1, Inserm, Stem Cell and Brain Research  
7 Institute U1208, 69500 Bron, France.  
8 2. Université De Toulouse Paul Sabatier, 31062 Toulouse, France  
9 3. Centre De Recherche Cerveau & Cognition, CNRS, UMR 5549, 31059 Toulouse, France  
10 4. Princeton Neuroscience Institute and Department of Psychology, Princeton  
11 University, Princeton, 08544, USA.  
12 5. Department of Neurobiology and Behavior, University of California, Irvine, Irvine,  
13 California 92717, USA

### 14 **Abstract**

15  
16 **Brain-mapping of the congenitally blind human reveals extensive plasticity<sup>1</sup>. The**  
17 **visual cortex of the blind has been observed to support higher cognitive functions**  
18 **including language and numerical processing<sup>2,3</sup>. This functional shift is**  
19 **hypothesized to reflect a metamodal cortical function, where computations are**  
20 **defined by the local network. In the case of developmental deafferentation, local**  
21 **circuits are considered to implement higher cognitive functions by**  
22 **accommodating diverse long-distance inputs<sup>4-7</sup>. However, the extent to which**  
23 **visual deprivation triggers a reorganization of the large-scale network in the**  
24 **cortex is still controversial<sup>8</sup>. Here we show that early prenatal ablation of the**  
25 **retina, an experimental model of anophthalmia in macaque, leads to a major**  
26 **reduction of area V1 and the creation of a default extrastriate cortex (DEC)<sup>9,10</sup>.**  
27 **Anophthalmic and normal macaques received retrograde tracer injections in DEC,**  
28 **as well as areas V2 and V4 post-natally. This revealed a six-fold expansion of the**  
29 **spatial extent of local connectivity in the DEC and a surprisingly high location of**  
30 **the DEC derived from a computational model of the cortical hierarchy<sup>11</sup>. In the**  
31 **anophthalmic the set of areas projecting to the DEC, area V2 and V4 does not differ**  
32 **from that of normal adult controls, but there is a highly significant increase in the**  
33 **relative cumulative weight of the ventral stream areas input to the early visual**  
34 **areas. These findings show that although occupying the territory that would have**  
35 **become primary visual cortex the DEC exhibits features of a higher order area,**  
36 **thus reflecting a combination of intrinsic and extrinsic factors on cortical**  
37 **specification. Understanding the interaction of these contributing factors will**  
38 **shed light on cortical plasticity during primate development and the neurobiology**  
39 **of blindness.**

### 40 **Main text**

41  
42  
43 Early visual cortex deafferentation via bilateral removal of the eyes at early stages of  
44 prenatal development in the macaque provides a non-human primate (NHP) model of  
45 anophthalmia. In NHP anophthalmics, there is an in-depth modification of the development of  
46 the visual system accompanied by characteristic sulci malformations; cortex destined to  
47 become striate cortex (area V1) reverts to a default phenotype (Default Extrastriate Cortex  
48 DEC)<sup>9,10,12</sup>. The three anophthalmics used in this study each showed important shifts in the  
49 border of striate cortex (area V1) leading to an important reduction in its dimensions (**Figure**

50 1). In these animals instead of the typical border between areas V1 and V2 one can detect a  
51 large region of interceding cortex where the stria of Genari is absent and its cytoarchitecture  
52 can be broadly defined as extrastriate. This stretch of cortex exhibits small islands of striate  
53 cortex and the hybrid expression of histochemical phenotypes of striate and extrastriate cortex  
54 both during *in utero* development and postnatally<sup>12,13</sup>. The cortex between area V2 and the  
55 reduced striate cortex area V1 corresponds to the DEC (lower panels of **Figure 1A,B**). The  
56 proportion of area V1 with respect to the total cortex is considerably reduced in anophthalmic  
57 brains compared to the normal (**Figure 1C**). This contrasts with the proportions of total visual  
58 cortex (including DEC) with respect to neocortex, which is similar in anophthalmics and  
59 normals, therefore coherent with deafferentation causing a border shift rather than merely a  
60 shrinkage of area V1. Hence the DEC plus the remaining area V1 in the anophthalmic  
61 matches the extent of area V1 in the normal animal<sup>14</sup>.

62 We used retrograde tracers that allow exploring the intrinsic labelling of a cortical area,  
63 which corresponds to the local connectivity<sup>15</sup>. In the normal brain intrinsic connectivity  
64 corresponds to 80-90% of the total connectivity and exhibits an exponential decline with  
65 distance<sup>15,16</sup>. In the anophthalmic brain the space constant of the exponential decline is  
66 significantly larger and intrinsic projections extend over considerable distances (**Figure 2A**).  
67 Hence in the normal V1 the 75% threshold is at 0.25mm, the 80% at 0.35mm and the 95% at  
68 0.80mm. In the DEC these distances are increased 4 to 6 fold (**Figure 2B**), so that local  
69 connectivity extends across a large extent of the DEC on the operculum (**Figure S1**).

70 The topography of connectivity in the anophthalmic was overall similar to that in the  
71 normal cortex. Following retrograde tracer injection in a target area, the numbers of labelled  
72 neurons in a given source area with respect to the total number of labelled neurons in the  
73 brain defines the Fraction of Labelled Neurons FLN, a weight index reflecting the strength of  
74 the particular pathway<sup>15</sup>. High frequency sampling of labelled neurons in the cortex allows  
75 characterization with a single injection of the weighted connectivity of a pathway linking any  
76 two cortical areas<sup>17</sup>. Injections limited to the grey matter were performed in DEC, V2 and V4  
77 in three anophthalmic brains (**Figures S2 Table 1**). Inspection of cortical labelling suggested  
78 that early visual deafferentation leads to an increase of numbers of labelled neurons in ventral  
79 stream areas (**Figures S2, Fig S3**). Injections in DEC and area V2 show that deafferentation  
80 profoundly affects the relative strengths of the dorsal and ventral pathways, as seen after  
81 summing the FLN values across all ventral versus dorsal stream areas (**Figure 2C, D**).  
82 Differences between normal and anophthalmic cumulative FLN values were not found to be  
83 significant following injections in area V4, suggesting that the effect of deafferentation are  
84 restricted to early cortical areas.

85 The laminar distribution of retrogradely labelled parent neurones of a pathway is  
86 defined by its proportion of supragranular labelled neurons or SLN index, which has been  
87 shown to be highly consistent across individuals<sup>11</sup>. The SLN values of a pathway define it as  
88 feedforward or feedback and specify a hierarchical distance<sup>18</sup>. In the absence of the retina  
89 there is an increase in numbers of labelled supragranular layer neurons (**Figures S4**). The  
90 SLN value for area V2 projections to DEC is significantly higher than for the V2 projection to  
91 V1 and likewise the projection of V3, FST and PIP to DEC have significantly increased SLN  
92 values (**Fig S4, panels A**). Following deafferentation, projections to area V2 showed  
93 significant increases in the SLN in areas V1 and V3 as well as the dorsal stream areas MT,  
94 V3A, LIP, PIP, STP and PGa as well as an increase in the ventral stream area TEO (**Figures**  
95 **S4, panel B**). By contrast, deafferentation had little or no effect on the SLN values for any of  
96 the projections to area V4 (**Figure S4D**) with the marked exception of V1 where only  
97 infragranular neurons were observed. However, given the very low FLN value, this cannot be  
98 considered significant. The most marked change in the SLN is the projection of area V1 to the  
99 DEC (**Figure 3A**). Labelled neurons in area V1 projecting to the DEC are entirely located in

100 the supragranular layers, which makes this projection very different from any projection from  
101 area V1 in the normal brain (**Figure 3A**). Area V1 also projects strongly to area V2, but the  
102 V1->V2 pathway originates from both infra- and supragranular layers. A projection of V1  
103 which is entirely from the supragranular layers would be to area V4, but the V1->V4 pathway  
104 is considerably weaker than the DEC->V4 pathway.  
105

106 SLN has been shown to be a robust indicator of hierarchical distance<sup>11,19</sup> (see Materials  
107 and Methods). When the SLN values extracted from injections at different levels are mapped  
108 on to hierarchical space by means of a sigmoid function they display surprisingly good  
109 agreement (Figure 3B). This is shown by the probit transformed values of SLN plotted in a  
110 pairwise fashion; if the transformation leads to a coherent measure of hierarchical distance the  
111 points will cluster around lines of unit slope. Importantly, both the normal and anophthalmic  
112 brains display this consistency in laminar organization (**Figure, 3B, C, D**). All the common  
113 projections to areas V1 and V2 in the normal cortex are feedback and, as expected, are  
114 observed in the lower left quadrant. This contrasts with the anophthalmic where V1 is in the  
115 top right quadrant, indicating it to be feedforward to DEC and V2. Consideration of an  
116 ensemble of SLN values following injections in areas V1, V2 and V4 allows fitting a  
117 hierarchical model to both the normal and anophthalmic data sets (**Figure 4A**)<sup>11</sup>. This shows  
118 that the overall layout of the ventral and dorsal stream areas remain approximately similar to  
119 that observed in the normal. However, in the anophthalmic brain, DEC and area V2 are  
120 considerably higher in the hierarchy than expected. The goodness of fit of the model is  
121 shown by close agreement between the empirical and estimated SLN values by source and  
122 target areas (**Figure 4B**, normal  $r^2=0.72$ ; enucleate  $r^2=0.67$ ).

123 The present results show that in the anophthalmic the topography of connectivity and  
124 global organization of the ventral and dorsal streams are largely conserved as has been  
125 suggested by imaging studies in the human congenitally blind<sup>20-26</sup>, in line with the evidence of  
126 early developmental specification of the functional streams<sup>27,28</sup>. Further, in the anophthalmic  
127 brain we observe an expansion of the ventral pathway that could reflect cross modal  
128 plasticity<sup>24</sup>.

129 The present findings show that early primate visual cortex in anophthalmia is  
130 profoundly modified both in its cytoarchitecture and local connectivity. While the global  
131 hierarchy remains largely conserved, there are important local changes in the hierarchical  
132 organization. These changes would seem to reflect a persistence of immature features making  
133 the congenitally blind 'visual' cortex neotenic. Indeed, interareal connectivity during *in utero*  
134 development in the primate undergoes extensive remodelling characterised by a greatly  
135 expanded population of supragranular projecting neurons, a global hierarchical organization  
136 similar to that found in the adult, an absence of ectopic pathways and finally a markedly  
137 extensive local connectivity<sup>11,29-31</sup>. The relatively high position in the cortical hierarchy and the  
138 conservation of an extensive local connectivity in the DEC could ensure the long time  
139 constants which would be required for the observed higher cognitive functions of the  
140 deafferentated cortex of the blind<sup>19,32</sup>.

141 The present findings need to be considered in view of current understanding of the  
142 developmental specification of the cortex. Developmental patterning of the neocortex is  
143 consequent to an interplay between intrinsic genetic mechanisms based on morphogens and  
144 secreted signalling molecules and extrinsic inputs relayed to the cortex by thalamocortical  
145 axons<sup>33-35</sup>. The role of thalamic axons in arealization is a multistep hierarchical process  
146 involving events at progenitor and neuronal levels<sup>36</sup>. A recent spatiotemporal transcriptome  
147 analysis of the pre- and postnatal macaque forebrain revealed a small number of genes that  
148 have persistent expression across cortical development, suggesting a large potential for  
149 extrinsic shaping of the cortex<sup>37</sup>. Interestingly, this study shows that areal and laminar

150 molecular phenotypes are acquired late postnatally indicating a wide and potentially  
151 important role of contextual shaping of the structure and function of the cortex, suggesting  
152 that particular attention should be paid to the care of the young congenitally blind.

153

154

155

156

157  
158  
159  
160  
161  
162  
163  
164  
165  
166  
167  
168  
169  
170  
171  
172  
173  
174  
175  
176  
177  
178  
179  
180  
181  
182  
183  
184  
185  
186  
187  
188  
189  
190  
191  
192  
193  
194  
195  
196  
197  
198  
199  
200  
201  
202  
203  
204  
205

## MATERIALS & METHODS

We examined the connectivity of the cortex in two 25-day old and one 10 month-old macaques that had been enucleated between 92 and 107 days before birth i.e. between embryonic day 58 (E58) and E73 (**Table 1**). In these three experimental animals we made six tracer injections, a fast blue (FB) and a dyamidino (DY) injection in each and we compared the results to 10 injections made in 8 adult controls.

*Anaesthesia and Surgery.* The present study is based on observations following bilateral enucleation performed in three monkey fetuses and contrasted to eight normal controls. The enucleated fetuses were carried to term and after birth injected with retrograde tracers (Diamidino Yellow, DY; and Fast Blue, FB) at different postnatal ages (**Table 1**). Pregnant cynomolgus monkeys (*Macaca fascicularis*) received atropine (1.25 mg, i.m.), dexamethasone (4 mg, i.m.), isoxsuprine (2.5 mg, i.m.), and chlorpromazine (2 mg/kg, i.m.) surgical premedication. They were prepared for surgery under ketamine hydrochloride (20 mg/kg, i.m) anaesthesia. Following intubation, anaesthesia was continued with 1-2% halothane in a N<sub>2</sub>O/O<sub>2</sub> mixture (70/30). The heart rate was monitored, and the expired CO<sub>2</sub> maintained between 4.5% and 6%. Body temperature was maintained using a thermostatically controlled heating blanket. Between embryonic day 58 (E58) and E73 and using sterile procedures a midline abdominal incision was made, and uterotomy was performed. The foetal head was exposed, bilateral eye removal performed, and the foetus replaced in the uterus after closing the incisions. The mother was returned to her cage and given an analgesic (visceralgine, 1.25 mg, i.m.) twice daily for 2 days. All fetuses were allowed normal development until term (E165).

*Injections of Retrograde Tracers* Identical medication, anaesthesia and monitoring procedures were used as described above. Tracer injections were placed in the DEC, area V2 and area V4. Injections were made by means of Hamilton syringes in a stereotypic fashion. Following injections, artificial dura mater was applied, the bone flaps were closed, cemented and the scalp stitched back into position.

The tracer injection sites are shown in **Figure 2**. Three injections are located in the DEC (top three rows in **Figure 2**), one in area V2 (fourth row **Figure 2**) and two in area V4 (last row **Figure 2**). All injections in the enucleate brain were confined to the cortical grey matter, and except for case BB122 LH DY (third row injection sites). BB122 LH DY injection in the DEC was very small and restricted to upper layers and is only considered for the examination of topography. Side-by-side injections in target areas of retrograde tracers reveal the topology of connectivity in source areas. Such side-by-side injections were made in the DEC in the lower part of the medial operculum in case BB181 corresponding in normal cortex to area V1 subserving parafoveal visual field<sup>38</sup>. In case BB122 a single injection was made in V2 near the lip of the lunate sulcus where foveal visual field is represented in the normal cortex<sup>39</sup>. Finally, a pair of very large injections were made on the dorsal part of the prelunate gyrus spanning the central and peripheral representation of area V4 in the normal brain<sup>40</sup>.

The full extent of labelled neurons were charted across the cortex, which was parcellated according to a 91 area atlas<sup>17</sup>. Injection of retrograde tracer in an area leads to a region of labelling in each afferent area. This region is referred to as the projection zone. So as to obtain reliable counts of labelled neurons it is necessary to chart labelled neurons throughout the full extent of the projection zone in each area<sup>11,29</sup>. This makes it possible to estimate the fraction of labelled neuron (FLN) and the ratio of supragranular layer neurons (SLN) in each area (see Materials and Methods). FLN is a weight index which allows construction of a weighted and directed matrix of the cortical network<sup>15</sup>, while SLN value of

206 interareal pathways constitutes an index of hierarchical distance, allowing areas to be  
207 organized in a determinate hierarchy<sup>11</sup>.

208 *Animal euthanasia* After 10 to 12 days of recovery that allows optimal retrograde  
209 labelling of neurons projecting to the pick-up zone, animals were anesthetised with ketamine  
210 (20 mg/kg, i.m.) followed by a lethal dose of Nembutal (60 mg/kg, i.p.) and perfused through  
211 the heart with a 1.25% paraformaldehyde and 1.5% glutaraldehyde solution. After fixation,  
212 perfusion was continued with a 10-30% sucrose solution to provide cryoprotection of the  
213 brain.

214 *Data Acquisition* Depending in the enucleation case, parasagittal (BB181) or horizontal  
215 (BB122 and BB169) sections (40- $\mu$ m thick) were cut on a freezing microtome and at least 1  
216 in 3 sections were stained for Nissl substance. Normal controls were cut in horizontal and  
217 coronal planes. Sections were observed in UV light with oil-immersion objectives using a  
218 Leitz fluorescence microscope equipped with a D-filter set (355-425 nm). High precision  
219 maps were made using Mercator software running on Exploranova technology, coupled to the  
220 microscope stage. Controlled high frequency sampling gives stable neuron counts despite  
221 curvature of the cortex and heterogeneity of neuron distribution in the projection zones of  
222 individual areas<sup>11,41</sup> Characteristics of neurons labelled with FB or DY are described by Keizer  
223 and colleagues<sup>42</sup>. Area limits and layer 4 were marked on the charts of labelled neurons. These  
224 neurons were then attributed to areas of our atlas based on landmarks and histology, and  
225 counted according to that parcellation<sup>17</sup>.

226 *Statistical analysis* All statistical analyses were performed in the R statistical  
227 environment<sup>43</sup> with additional tools from the MASS, aod, and Betareg packages<sup>44-46</sup>. Each  
228 injection gave rise to retrogradely labelled neurons, which were plotted and compared against  
229 those of normal animals, injected at anatomically equivalent locations. As previously shown<sup>15</sup>,  
230 the FLN (Fraction of Labelled Neurons), corresponds to the proportion of cells located in a  
231 given source area with respect to the total number of labelled neurons in the cortex. The  
232 connectivity profile is defined by the FLN values for each of the structures labelled from the  
233 injected target area. The SLN measurement of the proportion of supragranular labelled  
234 neurons in an area, has been shown to be a stable anatomical assessment of areal hierarchical  
235 relationships<sup>11,18</sup>.

236 *FLN*. The distribution of FLN values has been successfully modelled previously by a  
237 negative binomial distribution<sup>15,17</sup>. This can be performed using a Generalized Linear Model  
238 (GLM) when the dispersion parameter is fixed. We initially estimated the dispersion  
239 parameter for individual areas obtaining values between 10.43 and 11.7, and for subsequent  
240 tests used an average value of 4. We then used this model to compare connection strengths  
241 (i.e. FLN values) between normal (i.e. non-enucleated) and enucleated animals. As  
242 explanatory variables, we used a 2 level factor, Group (Normal/Enucleated) and an 2 level  
243 factor, Area for the labelled areas projecting on the target injection. The linear predictor in  
244 the GLM includes main effect of both factors and their interaction. In the model, the raw  
245 neuron counts enter as the response variable, but a log link is used with the natural log (i.e.  
246 base  $e$ ) of the total number of labelled neurons in each case included as a fixed offset. In this  
247 way, the model coefficients estimate FLN values. Confidence intervals were computed to  
248 assess the significance of the difference, based on the model fitted estimates. To test the effect  
249 of enucleation in either stream, the linear predictor was modified to include the factor Group  
250 and the two level factor, Stream (Ventral/Dorsal).

251 *SLN*. A similar approach was used to analyse SLNs (Supragranular Labelled Neurons,  
252 the proportion of labelled neurons situated above the layer 4 (granular layer) vs. below it, in  
253 each area) but using beta regression<sup>44</sup> to model the proportions. Since the beta distribution is  
254 defined on values in the interval (0, 1), it is useful to analyse proportions. Like the binomial,  
255 the parameters of interest are linked to the explanatory values via a linear predictor. In this

256 case a logit link was used. Like the negative binomial distribution on counts, the model  
257 includes a dispersion parameter that can account for overdispersion beyond that expected  
258 from a purely binomial process. As before, confidence intervals were evaluated and  
259 significance was assessed using likelihood ratio tests.

260 *Hierarchy.* SLN values were used to estimate hierarchical distances between areas in  
261 normal and enucleated data sets with a previously proposed model first<sup>11,19</sup>. A probit model is  
262 used to transform SLN values to a linear predictor

263

264

## References

265

266 <sup>1</sup> Sadato, N. *et al.* Activation of the primary visual cortex by Braille reading in blind  
267 subjects. *Nature* **380**, 526-528., (1996).

268 <sup>2</sup> Amedi, A., Floel, A., Knecht, S., Zohary, E. & Cohen, L. G. Transcranial magnetic  
269 stimulation of the occipital pole interferes with verbal processing in blind subjects.  
270 *Nat Neurosci* **7**, 1266-1270, (2004).

271 <sup>3</sup> Kanjlia, S., Lane, C., Feigenson, L. & Bedny, M. Absence of visual experience modifies  
272 the neural basis of numerical thinking. *Proc Natl Acad Sci U S A* **113**, 11172-11177,  
273 (2016).

274 <sup>4</sup> Pascual-Leone, A. & Hamilton, R. The metamodal organization of the brain. *Prog Brain*  
275 *Res* **134**, 427-445, (2001).

276 <sup>5</sup> Bedny, M. Evidence from Blindness for a Cognitively Pluripotent Cortex. *Trends Cogn*  
277 *Sci*, (2017).

278 <sup>6</sup> Sur, M. & Leamey, C. A. Development and plasticity of cortical areas and networks. *Nat*  
279 *Rev Neurosci* **2**, 251-262, (2001).

280 <sup>7</sup> Merabet, L. B. & Pascual-Leone, A. Neural reorganization following sensory loss: the  
281 opportunity of change. *Nat Rev Neurosci* **11**, 44-52, (2010).

282 <sup>8</sup> Hasson, U., Andric, M., Atilgan, H. & Collignon, O. Congenital blindness is associated  
283 with large-scale reorganization of anatomical networks. *Neuroimage* **128**, 362-372,  
284 (2016).

285 <sup>9</sup> Dehay, C., Horsburgh, G., Berland, M., Killackey, H. & Kennedy, H. Maturation and  
286 connectivity of the visual cortex in monkey is altered by prenatal removal of retinal  
287 input. *Nature* **337**, 265-267, (1989).

288 <sup>10</sup> Rakic, P. Specification of cerebral cortical areas. *Science* **241**, 170-176, (1988).

289 <sup>11</sup> Markov, N. T. *et al.* The Anatomy of Hierarchy: Feedforward and feedback pathways  
290 in macaque visual cortex. *J Comp Neurol* **522**, 225-259, (2014).

291 <sup>12</sup> Dehay, C., Giroud, P., Berland, M., Killackey, H. P. & Kennedy, H. Phenotypic  
292 characterisation of respecified visual cortex subsequent to prenatal enucleation in the  
293 monkey: development of acetylcholinesterase and cytochrome oxidase patterns. *J*  
294 *Comp Neurol* **376**, 386-402, (1996).

295 <sup>13</sup> Dehay, C., Giroud, P., Berland, M., Killackey, H. & Kennedy, H. Contribution of thalamic  
296 input to the specification of cytoarchitectonic cortical fields in the primate: effects of  
297 bilateral enucleation in the fetal monkey on the boundaries, dimensions, and  
298 gyrification of striate and extrastriate cortex. *J Comp Neurol* **367**, 70-89, (1996).

299 <sup>14</sup> Dehay, C., Horsburgh, G., Berland, M., Killackey, H. & Kennedy, H. The effects of  
300 bilateral enucleation in the primate fetus on the parcellation of visual cortex. *Dev*  
301 *Brain Res* **62**, 137-141, (1991).

302 <sup>15</sup> Markov, N. T. *et al.* Weight Consistency Specifies Regularities of Macaque Cortical  
303 Networks. *Cereb Cortex* **21**, 1254-1272, (2011).

- 304 <sup>16</sup> Horvat, S. *et al.* Spatial Embedding and Wiring Cost Constrain the Functional Layout  
305 of the Cortical Network of Rodents and Primates. *PLoS Biol* **14**, e1002512, (2016).
- 306 <sup>17</sup> Markov, N. T. *et al.* A weighted and directed interareal connectivity matrix for  
307 macaque cerebral cortex. *Cereb Cortex* **24**, 17-36, (2014).
- 308 <sup>18</sup> Barone, P., Batardiere, A., Knoblauch, K. & Kennedy, H. Laminar distribution of  
309 neurons in extrastriate areas projecting to visual areas V1 and V4 correlates with the  
310 hierarchical rank and indicates the operation of a distance rule. *J Neurosci* **20**, 3263-  
311 3281, (2000).
- 312 <sup>19</sup> Chaudhuri, R., Knoblauch, K., Gariel, M. A., Kennedy, H. & Wang, X. J. A Large-Scale  
313 Circuit Mechanism for Hierarchical Dynamical Processing in the Primate Cortex.  
314 *Neuron* **88**, 419-431, (2015).
- 315 <sup>20</sup> Striem-Amit, E., Cohen, L., Dehaene, S. & Amedi, A. Reading with sounds: sensory  
316 substitution selectively activates the visual word form area in the blind. *Neuron* **76**,  
317 640-652, (2012).
- 318 <sup>21</sup> Striem-Amit, E., Dakwar, O., Reich, L. & Amedi, A. The large-scale organization of  
319 "visual" streams emerges without visual experience. *Cereb Cortex* **22**, 1698-1709,  
320 (2012).
- 321 <sup>22</sup> Striem-Amit, E. *et al.* Functional connectivity of visual cortex in the blind follows  
322 retinotopic organization principles. *Brain* **138**, 1679-1695, (2015).
- 323 <sup>23</sup> Matteau, I., Kupers, R., Ricciardi, E., Pietrini, P. & Ptito, M. Beyond visual, aural and  
324 haptic movement perception: hMT+ is activated by electrotactile motion stimulation  
325 of the tongue in sighted and in congenitally blind individuals. *Brain Res Bull* **82**, 264-  
326 270, (2010).
- 327 <sup>24</sup> Ptito, M., Matteau, I., Gjedde, A. & Kupers, R. Recruitment of the middle temporal area  
328 by tactile motion in congenital blindness. *Neuroreport* **20**, 543-547, (2009).
- 329 <sup>25</sup> Pietrini, P. *et al.* Beyond sensory images: Object-based representation in the human  
330 ventral pathway. *Proc Natl Acad Sci U S A* **101**, 5658-5663, (2004).
- 331 <sup>26</sup> van den Hurk, J., Van Baelen, M. & Op de Beeck, H. P. Development of visual category  
332 selectivity in ventral visual cortex does not require visual experience. *Proc Natl Acad*  
333 *Sci U S A* **114**, E4501-E4510, (2017).
- 334 <sup>27</sup> Deen, B. *et al.* Organization of high-level visual cortex in human infants. *Nat Commun*  
335 **8**, 13995, (2017).
- 336 <sup>28</sup> Livingstone, M. S. *et al.* Development of the macaque face-patch system. *Nat Commun*  
337 **8**, 14897, (2017).
- 338 <sup>29</sup> Barone, P., Dehay, C., Berland, M., Bullier, J. & Kennedy, H. Developmental remodeling  
339 of primate visual cortical pathways. *Cereb Cortex* **5**, 22-38, (1995).
- 340 <sup>30</sup> Luhmann, H. J., Martinez Millan, L. & Singer, W. Development of horizontal intrinsic  
341 connections in cat striate cortex. *Exp Brain Res* **63**, 443-448, (1986).
- 342 <sup>31</sup> Khazipov, R. & Luhmann, H. J. Early patterns of electrical activity in the developing  
343 cerebral cortex of humans and rodents. *Trends Neurosci* **29**, 414-418, (2006).
- 344 <sup>32</sup> Honey, C. J. *et al.* Slow cortical dynamics and the accumulation of information over  
345 long timescales. *Neuron* **76**, 423-434, (2012).
- 346 <sup>33</sup> O'Leary, D. D., Chou, S. J. & Sahara, S. Area patterning of the mammalian cortex.  
347 *Neuron* **56**, 252-269, (2007).
- 348 <sup>34</sup> De la Rossa, A. *et al.* In vivo reprogramming of circuit connectivity in postmitotic  
349 neocortical neurons. *Nat Neurosci* **16**, 193-200, (2013).
- 350 <sup>35</sup> Geschwind, D. H. & Rakic, P. Cortical evolution: judge the brain by its cover. *Neuron*  
351 **80**, 633-647, (2013).



- 352 <sup>36</sup> Pouchelon, G. & Jabaudon, D. Nurturing the cortex's thalamic nature. *Curr Opin Neurol*  
353 **27**, 142-148, (2014).
- 354 <sup>37</sup> Bakken, T. E. *et al.* A comprehensive transcriptional map of primate brain  
355 development. *Nature* **535**, 367-375, (2016).
- 356 <sup>38</sup> Gattass, R., Sousa, A. P. & Rosa, M. G. Visual topography of V1 in the Cebus monkey. *J*  
357 *Comp Neurol* **259**, 529-548, (1987).
- 358 <sup>39</sup> Gattass, R., Gross, C. G. & Sandell, J. H. Visual topography of V2 in the macaque. *J Comp*  
359 *Neurol* **201**, 519-539, (1981).
- 360 <sup>40</sup> Li, C. Y., Tanaka, M. & Creutzfeldt, O. D. Attention and eye movement related activation  
361 of neurons in the dorsal prelunate gyrus (area DP). *Brain Res* **496**, 307-313, (1989).
- 362 <sup>41</sup> Vezoli, J. *et al.* Quantitative analysis of connectivity in the visual cortex: extracting  
363 function from structure. *Neuroscientist* **10**, 476-482, (2004).
- 364 <sup>42</sup> Keizer, K., Kuypers, H. G. J. M., Huisman, A. M. & Dann, O. Diamidino Yellow  
365 dihydrochloride (DY 2HCl): a new fluorescent retrograde neuronal tracer, which  
366 migrates only very slowly out of the cell. *Exp Brain Res* **51**, 179-191, (1983).
- 367 <sup>43</sup> R Development Core Team. R: A language and environment for statistical computing  
368 (R Foundation for statistical computing. <http://www.r-project.org/>, Vienna, Austria.,  
369 2016).
- 370 <sup>44</sup> Cribari-Neto, F. & Zeileis, A. Beta Regression in R. *J Stat Soft* **34**, 1-24, (2010).
- 371 <sup>45</sup> Lesnoff, M. & Lancelot, R. aod: Analysis of Overdispersed Data. *R package version 1.3*  
372 <http://cran.r-project.org/package=aod>, (2012).
- 373 <sup>46</sup> Venables, W. N. & Ripley, B. D. *Modern Applied Statistics with S*. 4th edn, (Springer,  
374 2002).
- 375  
376  
377  
378

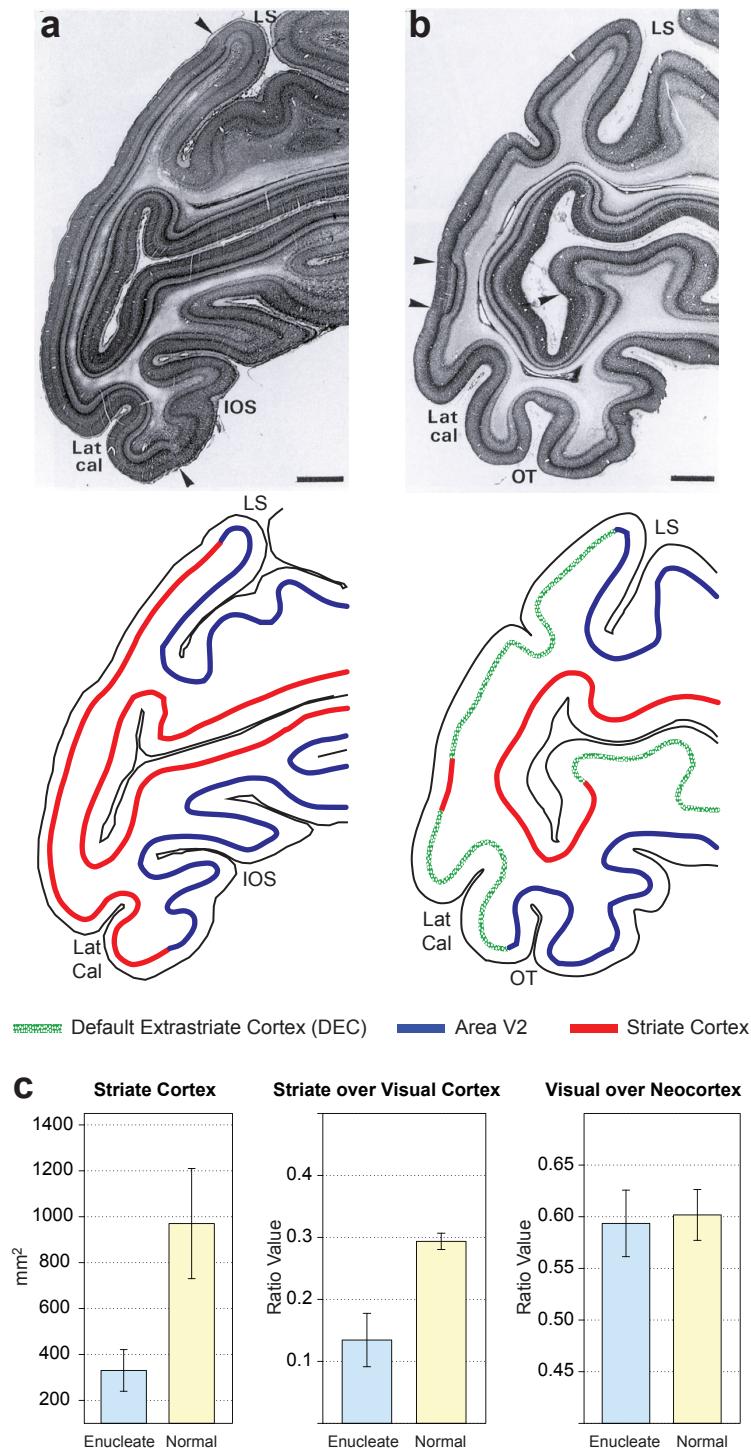

379  
380  
381  
382  
383  
384  
385  
386  
387  
388  
389  
390

**Figure 1. Effects of early enucleation on cortical parcellation.** (a) Upper panel parasagittal Nissl stained sections showing cytoarchitecture; lower panel schematic showing the limits of striate cortex and area V2; (b) upper panel, parasagittal Nissl stained section in the neonate following prenatal enucleation at 68 days after conception (E68); lower panel, limits of areas V1, V2 and default extrastriate cortex. Sections in A and B taken from equivalent levels, arrow heads indicate limits of striate cortex. Note, large reduction of striate cortex on operculum and more modest reduction in the calcarine, scale bars, 2 mm. (c) Quantitative effects of enucleation on proportions of visual cortex; left-hand panel, surface area of striate cortex ( $p = 4.04e-05$ , 7 enucleates, 6 normals); middle-panel, proportion of striate cortex with respect to total visual cortex ( $p = 3.04e-06$ , 7 enucleates, 6 normals); right-hand panel, proportion of visual cortex with respect to total cortex ( $p = 0.63$ , 6 enucleates, 6 normals).

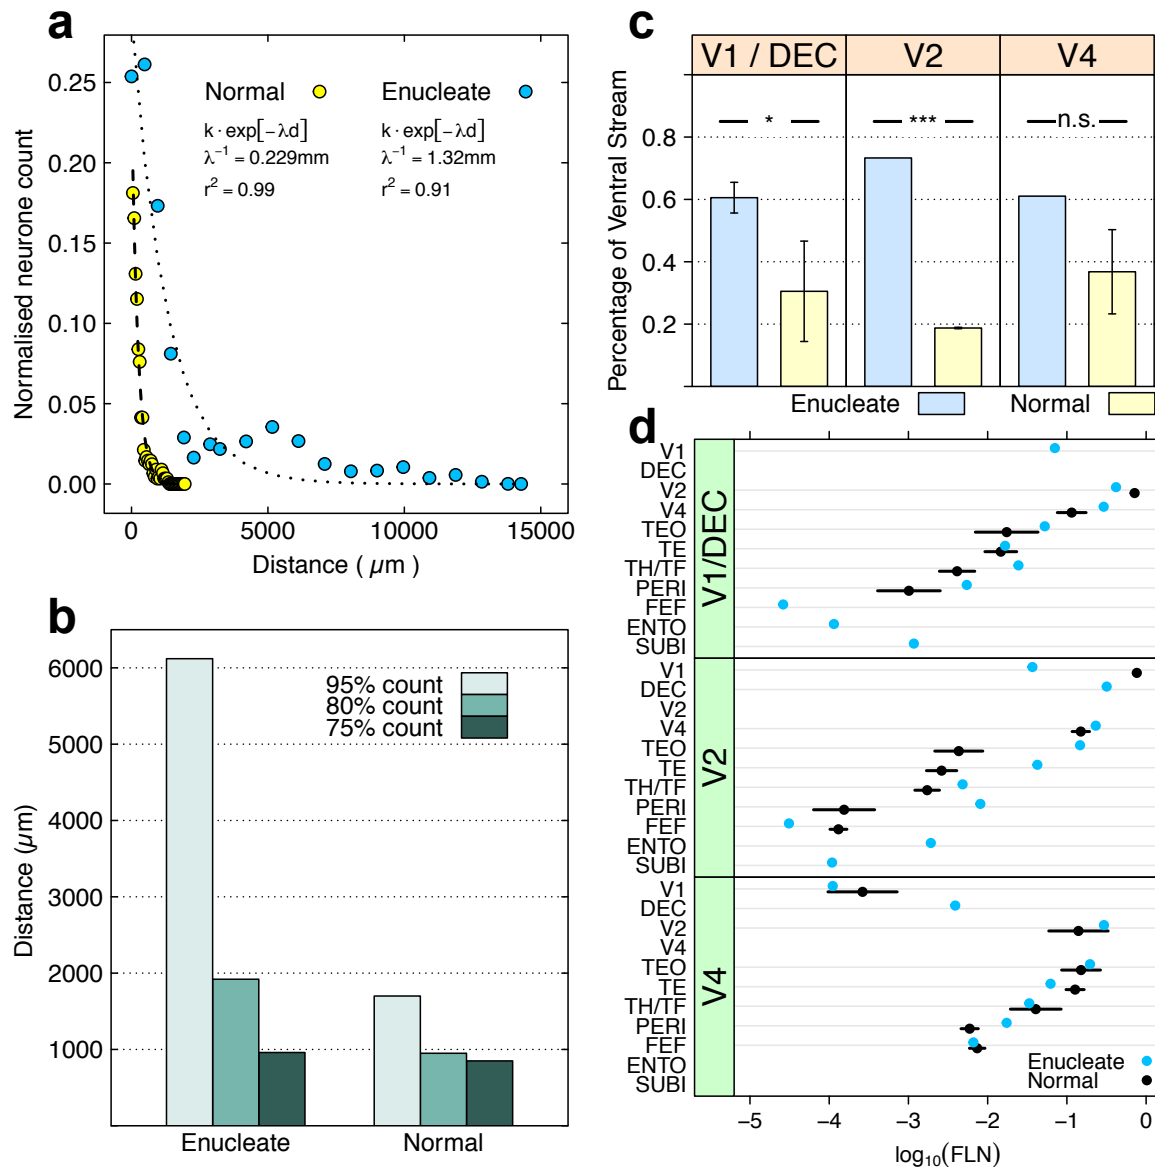

391  
 392 **Figure 2. Intrinsic connectivity following enucleation and effects of ventralization.** (a) Exponential decay of  
 393 density of intrinsic neurons with distance following injection in area V1 of a normal (yellow dots, dashed line  
 394 fit) and in the DEC (enucleation at E73) (blue dots, dotted line fit). The dashed and dotted lines represent  
 395 exponential fits. (b) Distances within which the 3 thresholds (75%, 80%, and 95%) of intrinsic labelling are  
 396 attained in normal V1 and in the DEC (enucleation at E73). (c) mean cumulative sum of Fraction of Labelled  
 397 Neurons (FLN) in ventral stream areas; far-left panel, injections in area V1 and default extrastriate cortex (DEC;  
 398  $p = 0.0155$ ); middle panel, injections in area V2 ( $p < 2e-16$ ); right-hand panel, injections in area V4 ( $p = 0.301$ ).  
 399 Enucleate vs. normal across all injection:  $p = 2.52e-04$ . All tests were performed assuming that the proportions  
 400 followed a beta distribution<sup>44</sup>. (d) Effect of enucleation on connexion strength in ventral stream areas. Log scale  
 401 dot plot of FLN. Enucleates, blue dots; normal controls, black dots; upper-panel, injections in normal striate  
 402 cortex (V1) and Default Extrastriate Cortex (DEC) (1 enucleate, 5 normals); middle-panel, injections in area V2  
 403 (1 enucleate, 3 normals); bottom panel, injections in area V4 (2 enucleates, 3 normal). For abbreviations of area  
 404 names see glossary.  
 405

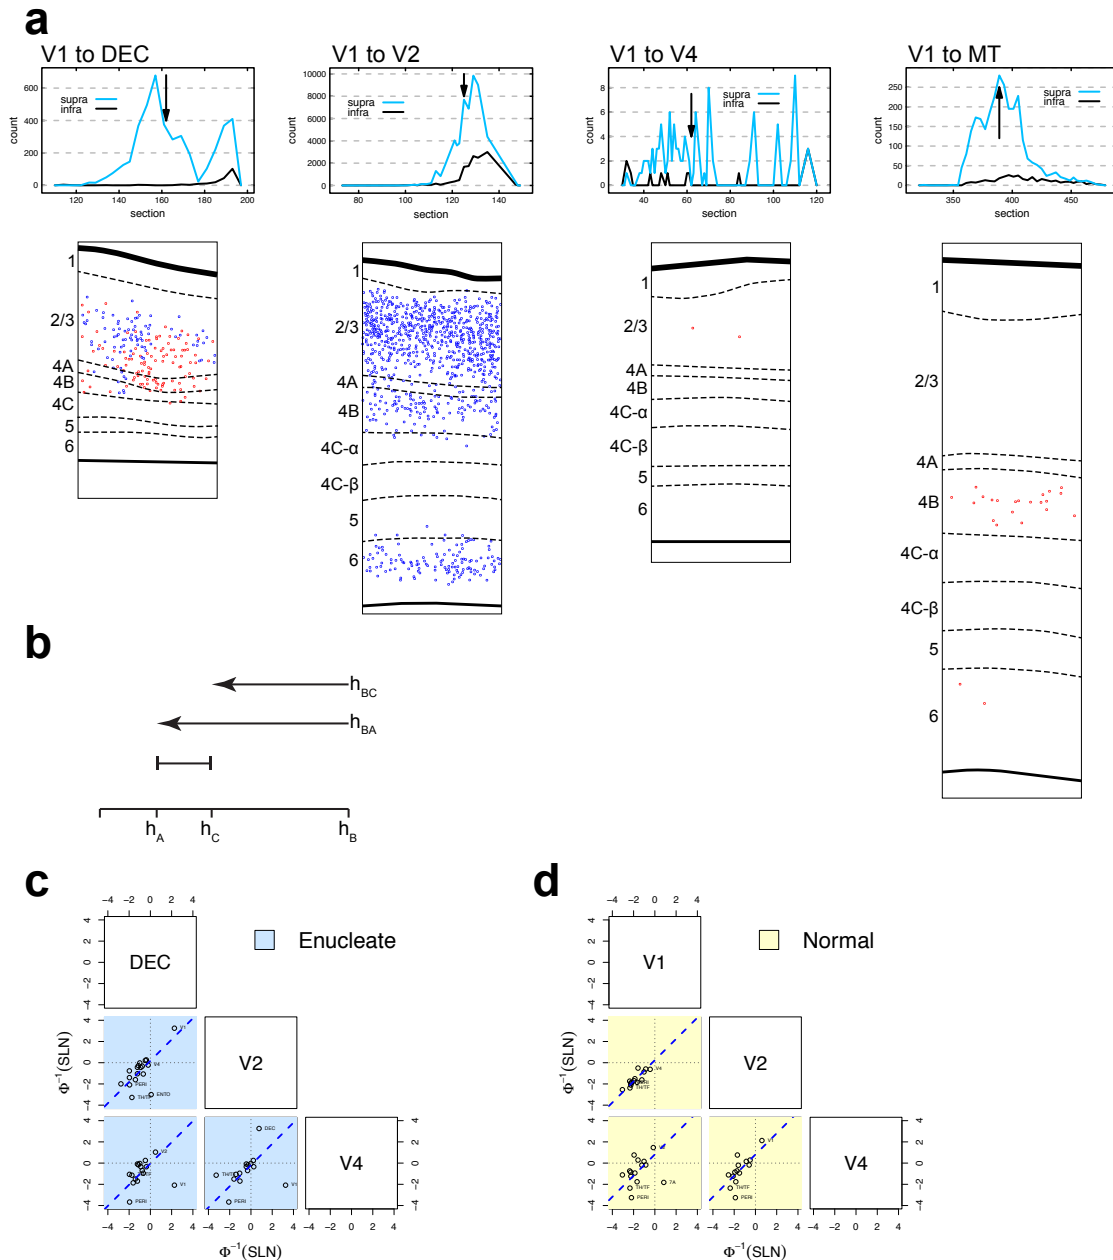

406  
407  
408  
409  
410  
411  
412  
413  
414  
415  
416  
417  
418  
419  
420  
421  
422  
423  
424

**Figure 3.** (a) High power plots comparing laminar distributions of V1->DEC to projections in the normal cortex. This comparison shows that the V1->DEC has no counter part in the normal cortex, either in terms of strength of projection nor laminar distribution. (b) Schematic illustration of distance relations motivating the pairs plots of SLN values. Suppose that SLN is related to the hierarchical distance between an injected area  $A$  and the areas projecting to it  $B_A$ . In particular, suppose that some function,  $h$ , of the SLN provides this distance so that  $h(\text{SLN}_{B \rightarrow A}) = h_{BA}$  is the hierarchical distance between  $A$  and  $B$ . If we assume that this distance measure does not depend on the area injected or the pairs of areas compared, then we should expect that for injections in areas  $A$  and  $C$  that have a common projection  $B$ , the distance  $h_{BA} = h_{BC} + h_{CA}$ . As the relation does not depend on the particular common area  $B$ , it should be true for all of the common projections to areas  $A$  and  $C$ , i.e., that they are related by the fixed distance between areas  $A$  and  $C$ . This implies in turn that if there is a transformation of the SLN values that maps onto a common distance scale across areas, then when we plot the transformed SLN values of the common areas for two injection sites against each other, the values will fall along a line of unit slope (blue dashed line in (b) and (c)) whose intercept is the distance between the two injection sites,  $h_{CA}$ . (c) and (d) Pairs plots between probit-transformed SLN values of common areas from injections in V1/DEC, V2 and V4 (as indicated in the boxes along the diagonal). Each point represents the average pair of SLN values obtained in a single source area; the blue dashed lines indicate the best fitting lines of unit slope. (c) Enucleated cases (blue background). (d) Data from normal controls (yellow background). Area labels for points of potential interest and outliers are indicated to the right of the point.

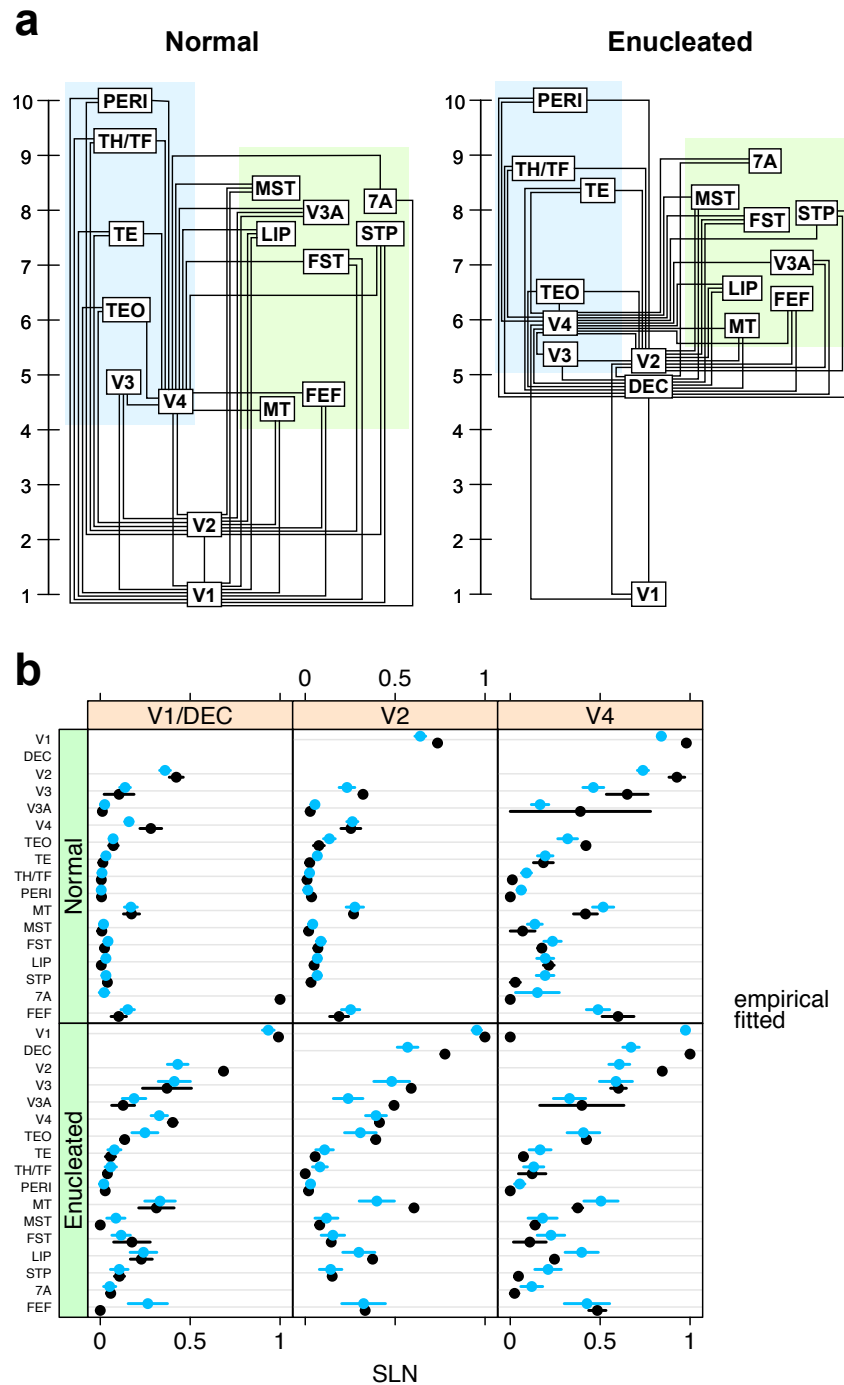

425  
426  
427  
428  
429  
430  
431  
432  
433  
434  
435  
436  
437  
438  
439

**Figure 4. Developmental plasticity of the visual hierarchy.** (a) Hierarchical relationship between areas in the visual system based on injections in V1, V2 and V4 in normal animals (A), and following enucleation and injections in Default Extrastriate Cortex (DEC), V2 and V4. The model fitted was  $\text{probit}(E(\text{SLN})) = X\beta$ , where  $\text{probit}$  is the inverse of a Gaussian cumulative distribution function applied to the expected value of the SLN and  $X$  is an  $n \times p$  incidence matrix for the connectivity with a column for each of  $p$  areas and a row for each of  $n$  pairs of connected areas (repeated injections may appear as multiple rows). All elements of  $X$  are 0 except in the two columns corresponding to the connecting pairs for that row, taking on the values -1 and 1 for the target and source, respectively. One column is dropped for model identifiability.  $\beta$  is a vector of hierarchical values to be estimated. The hierarchical levels are estimated by maximum likelihood assuming that the SLN values follow a beta-binomial distribution (see Markov et al., 2014). The model is only determined up to a linear combination so that the values have been scaled to the range 1-10. (b) Detailed comparison of the model with the data for each injection by labelled area; black dots, empirical values; blue squares, predicted values. Error bars are empirical SEs for the data and model based SEs for the predictions.
